# Supplementary material
Source: PubMed Central journal article supplement (PMC5193103)

# Group results of paired-pulse TMS protocols

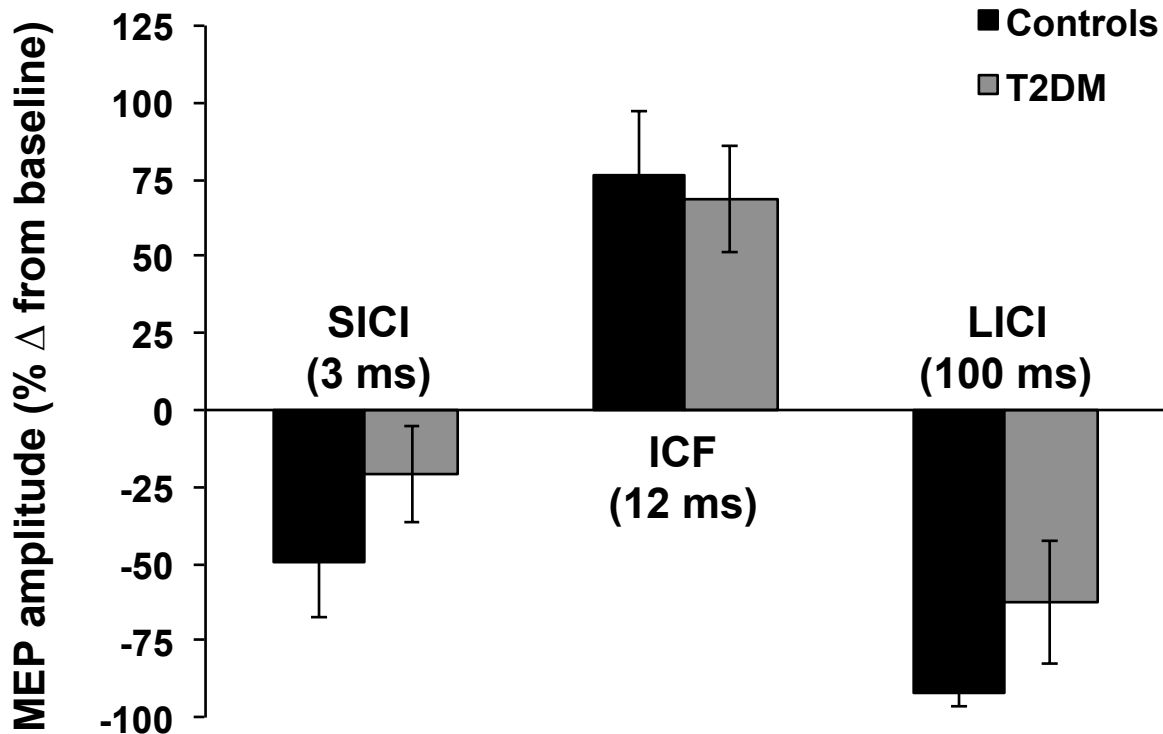

Supplement: NIHMS835993-supplement-Supplementary_Figure_S1.pdf [file NIHMS835993-supplement-Supplementary_Figure_S1.pdf]

# Group results of Motor Thresholds

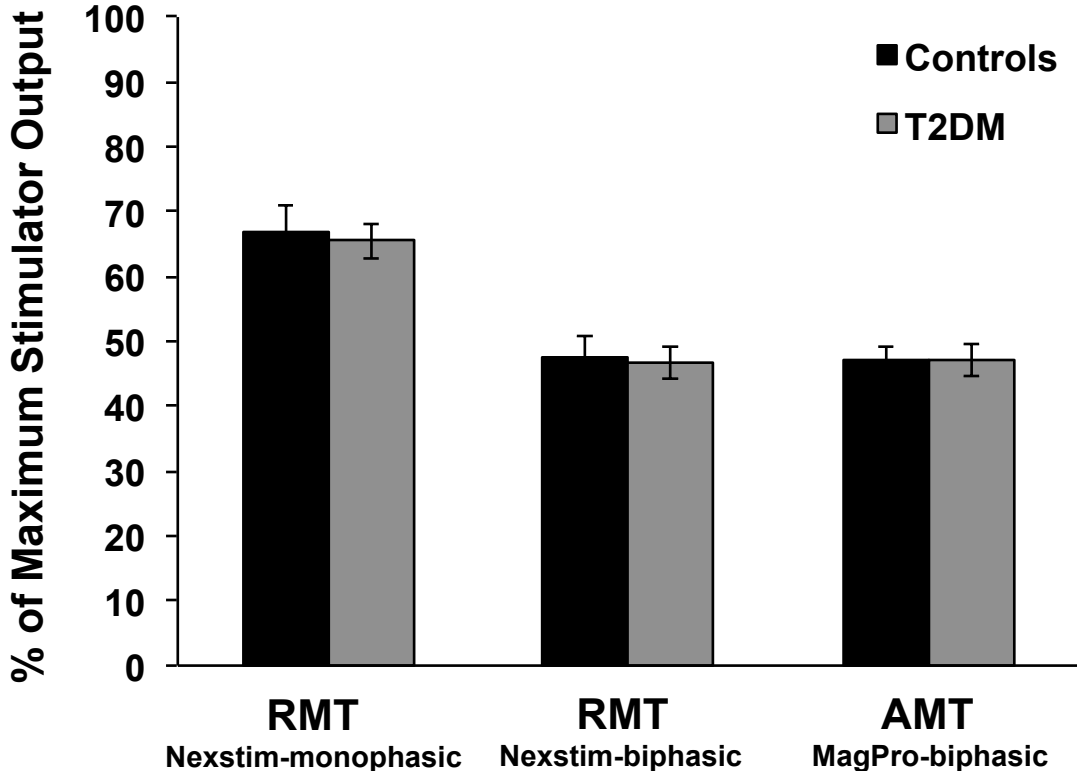

Supplement: NIHMS835993-supplement-Supplementary_Figure_S2.pdf [file NIHMS835993-supplement-Supplementary_Figure_S2.pdf]

## Group results of Baseline MEPs

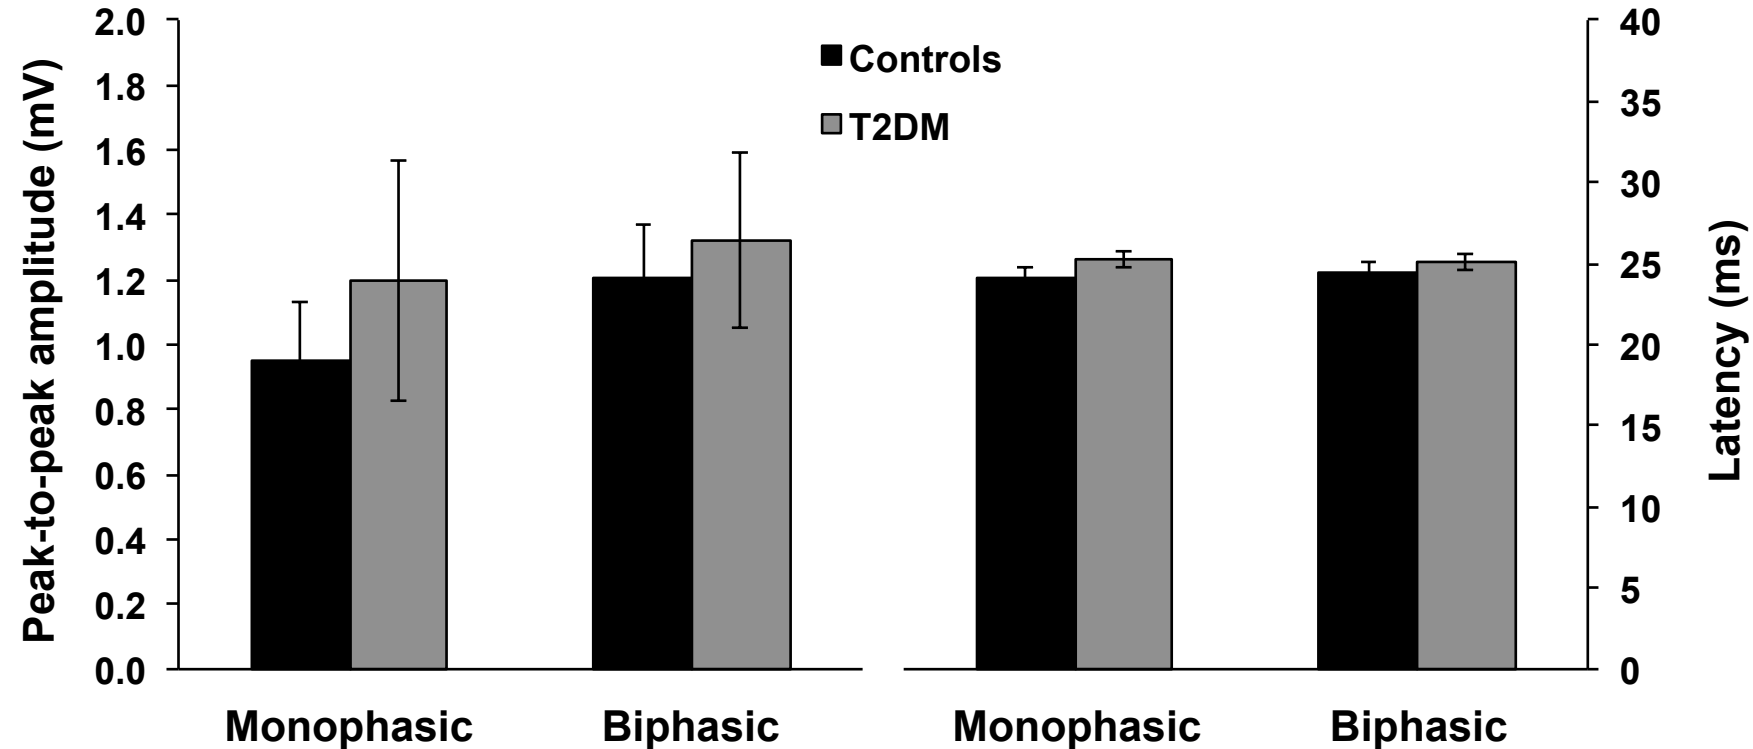

Supplement: NIHMS835993-supplement-Supplementary_Figure_S3.pdf [file NIHMS835993-supplement-Supplementary_Figure_S3.pdf]
